# Supplementary material for: Nucleosome compaction facilitates HP1γ binding to methylated H3K9
Source: Nucleic Acids Res. 2015 Aug 28;43(21):10200–12. doi: 10.1093/nar/gkv841 (PMC4666388; doi:10.1093/nar/gkv841)

## Supplementary Information

### Supplementary Methods

#### ***Protein purification***

Truncated H1.3 coding 37-211 ( $\Delta$ N) and 1-111 amino acids ( $\Delta$ C) were expressed and purified as described elsewhere (1).

#### ***The affinity between HP1 $\gamma$ and histone H3N-terminal peptides***

The affinities of HP1 $\gamma$  and the CD domain towards the N-terminal tail peptide (1-19) of H3 were determined by ITC as described previously (2). The N-terminal peptide of H3 (1-19) containing H3cK9me3, in which lysine residue was replaced with aminoethyl cysteine, was prepared as described (2). In brief, histone H3 (1-19) carrying K9C mutation was expressed with SUMO-tag in bacteria. The fusion protein was digested with SENP2 protease, and the peptide was purified with reverse phase chromatography. The unmodified or trimethylated lysine analogue was introduced into the peptide as described (3).

#### ***Gel shift assays***

GST, GST- HP1 $\gamma$ , GST- HP1 $\gamma$  CD+HR, GST- HP1 $\gamma$  CD, GST-HP1 $\alpha$  CD+HR, GST- HP1 $\alpha$  CD, and GST-HP1 $\gamma$ - $\alpha$ HR (1, 4, and 8  $\mu$ M) was mixed with 25 nM of monosomal DNA without linker, of length 147bp, described by Mishima *et al.* (2), in the binding buffer including 100 mM NaCl and the binding activity was determined as described in the Materials and Methods. To examine the interaction between GST-HP1 $\gamma$  and DNA in the presence of MgCl<sub>2</sub>, 3 mM MgCl<sub>2</sub>, instead of EDTA, was added in the binding buffer including 100 mM NaCl, and separated in a 0.7% agarose gel in 45 mM Tris-borate, and 3 mM MgCl<sub>2</sub>.

#### ***MgCl<sub>2</sub>-dependent nucleosome precipitation***

Nucleosomes were precipitated by centrifugation in the presence of MgCl<sub>2</sub> (4, 5). In brief, 40 ng DNA/ $\mu$ l tetra-nucleosomes or mono-nucleosomes in buffer B comprising 2.5 mM NaCl, 0.25 mM EDTA, 10 mM Tris-HCl, pH 7.8 were mixed with an equal volume of buffer B containing MgCl<sub>2</sub> to make the indicated final MgCl<sub>2</sub> concentrations. After the incubation at room temperature for 10 min, samples were centrifuged at 10,000 x g for 10 min at room temperature. The absorbance at 260 nm of the supernatant fraction, which was not precipitated, was determined in a Nanodrop (Thermo Fisher Scientific, Inc).

### ***Gel filtration***

Purified HP1 without GST tag was separated by size exclusion chromatography, as described in Materials and Methods, with slight modification. The buffer used contained either 0.2 mM EDTA or 3 mM MgCl<sub>2</sub>.

### ***MgCl<sub>2</sub>-dependent binding of HP1γ to tetra-nucleosomes***

To analyze the interaction between HP1γ and reconstituted nucleosomes, 0.2 nM HP1γ and 90 nM of tetra-nucleosomes (amount converted to that of a nucleosome particle with a histone octamer) were mixed in 10 μl of binding buffer containing 6 mM MgCl<sub>2</sub>, incubated at room temperature for 30 min, and then centrifuged at 10,000 x g for 10 min at 4°C. The supernatant and precipitated fractions were separately electrophoresed in an 18% SDS-polyacrylamide gel. The protein bands were transferred onto a nitrocellulose membrane, and the HP1γ and H4 were immuno-detected with the specific antibodies.

### ***Pull down assay determining nucleosome-binding activity of HP1α***

Pull down assay was performed as described in Materials and Methods. Two or four pmol (amount converted to that of a nucleosome particle with a histone octamer) of reconstituted nucleosomes were incubated with 40 or 80 pmol of GST- HP1α-bound GSH-Sepharose, unless otherwise mentioned.

### ***H1-dependent nucleosome precipitation***

Tetra-nucleosomes (0.2 μM, amount converted to that of a nucleosome particle with a histone octamer) were incubated with 0.8 μM H1 in the binding buffer, and centrifuged at 10,000 x g for 1 min at 4°C. As a control, 0.5 μM HP1γ, I155K, or the CD, or 0.8 μM H1 alone was centrifuged. The supernatant and precipitated fractions were electrophoresed in an 18% SDS-polyacrylamide gel, and stained with Lumitein.

### ***Pull-down assay in the presence of H1***

Pull-down assays were performed as described in the Materials and Methods, except for fixed amount of H1 (four molar excess amount converted to that of a nucleosome particle with a histone octamer) was added to the reaction mixture.

## **Legends for Supplementary Figures**

### **Supplementary Figure S1. Affinity of HP1 $\gamma$ to the N-terminal peptide of H3.**

ITC titration curves of full-length HP1 $\gamma$  (FL) **(A)** and the CD of HP1 $\gamma$  coding (1-75) (CD) **(B)** towards the N-terminal peptide of histone H3 (1-19) containing lysine analogue at K9 with tri-methylated (H3cK9me3) (left panel) or unmethylated (H3cK9me0) (right panels) are shown. **(C)** The dissociation constants are calculated by fitting the data using the ITC data analysis module of Origin 7.0 (OriginLab, Northampton, MA). The dissociation constants are shown in  $\mu$ M. Measurements below the detection limit are indicated as b.d. The dissociation constants for HP1 $\alpha$  (\*) are taken from a previous report (2).

### **Supplementary Figure S2. HP1 $\alpha$ , HP1 $\gamma$ , and H1 isoforms used in the present study.**

**(A)** Amino acid sequences of human HP1 $\alpha$  and HP1 $\gamma$  aligned with ClustalW (<http://clustalw.ddbj.nig.ac.jp/>). The CD, HR, and CSD are indicated in light blue, dark blue, and red, respectively. Identical amino acids are indicated as asterisks below the alignment. Colon and dot indicate similar and less similar amino acids, respectively. Ile 165 in HP1 $\alpha$ , which is reported to be crucial for dimerization (6), is enclosed with red square. Ile 155 in HP1 $\gamma$  is the corresponding residue to the Ile 155 in HP1 $\alpha$ . **(B)** SDS-polyacrylamide gel electrophoresis of purified HP1 $\alpha$ , HP1 $\gamma$ , and H1 isoforms. Recombinant GST, GST-tagged wild-type, truncated and mutant HP1 $\alpha$ , HP1 $\gamma$ , and their chimera HP1 (upper left panel), HP1 $\alpha$ , HP1 $\gamma$ , HP1 $\alpha$  I165K, HP1 $\gamma$  I155K, and HP1 $\gamma$ (1-75) (upper right panel), wild type H1.2, H1.3, H1.4, and H1.5 (lower left panel), and the N- and C-terminal truncated H1.3 (lower right panel) (0.5  $\mu$ g each) were separated in 18% SDS-polyacrylamide gels, and stained with Coomassie Brilliant Blue (CBB). Molecular size markers are indicated at left of each panel.

### **Supplementary Figure S3. DNA binding activity of GST-HP1 $\gamma$ and GST-HP1 $\alpha$ .**

**(A)** Naked DNA was incubated without protein (lane 1), with GST-HP1 $\alpha$  (lanes 2-4), GST- HP1 $\gamma$  (lanes 5-7), GST-HP1 $\gamma$ - $\alpha$ HR (lanes 8-10) or GST (lanes 11-13). To DNA, 40 (lanes 2, 5, 8 and 11), 160 (lanes 3, 6, 9 and 12), or 320 (lanes 4, 7, 10 and 13) molar excess of protein was added, and the binding activity was examined as described in **Figure 3A**. **(B)** Naked DNA was incubated without (lane 1) or with GST-HP1 $\gamma$  (lanes 2-4). To the DNA, 40 (lane 2), 160 (lane 3), or

320 (lane 4) molar excess of GST-HP1 $\gamma$  was added in the presence of 3 mM MgCl<sub>2</sub>, and the reaction mixture was separated in a 0.7% agarose containing 45 mM Tris-borate, and 3 mM MgCl<sub>2</sub>. Arrowhead and bracket indicate the position of free DNA and shifted DNA, respectively.

**Supplementary Figure S4. The CSD of GSTHP1 $\gamma$  negatively regulates the binding to DNA.**

(A) Schematic illustration of truncated GST-HP1 $\gamma$ . (B) The binding of tetra-nucleosomes to the GST-HP1 $\gamma$  deleted the HR and/or the CSD was determined as described in Figure 1C. The GSH-Sepharose bound with the truncated GST-HP1 $\gamma$  was incubated with unmethylated H3 (unme) or H3K9me3 (K9me3) tetra-nucleosomes (left panel). The relative amounts of core histones recovered in the bound fraction over the input (%) were calculated and shown as mean  $\pm$  S. E. (n=3) (right panel). (C) Naked DNA was incubated without protein (lane 1), with GST-HP1 $\alpha$ FL (lanes 2-4), GST-HP1 $\alpha$ CD+HR (lanes 5-7), GST-HP1 $\alpha$ CD (lanes 8-10), GST-HP1 $\gamma$  (lanes 11-13), GST-HP1 $\gamma$ CD+HR (lanes 14-16), or GST-HP1 $\gamma$ CD (lanes 17-19). To the DNA, 40 (lanes 2, 5, 8, 11, 14 and 17), 160 (lanes 3, 6, 9, 12, 15 and 18), or 320 (lanes 4, 7, 10, 13, 16 and 19) molar excess of protein was added, and the binding activity was determined as described in Figure 3A. Arrowhead and bracket indicate the position of free DNA and shifted DNA, respectively.

**Supplementary Figure S5. Effect of MgCl<sub>2</sub> concentration on the aggregation state of tetra- and mono-nucleosomes.**

Unmethylated H3 (open circles) and H3K9me3 (closed circles) tetra- (A), or mono-nucleosomes (B) were incubated with indicated concentrations of MgCl<sub>2</sub>, and then centrifuged. The absorbance at 260 nm of the input and supernatant fractions was determined, and ratio (%) of tetra- and mono-nucleosomes in the supernatant to the input is shown as mean  $\pm$  S. E. (n=3).

**Supplementary Figure S6. Effect of MgCl<sub>2</sub> on the elution profile of HP1 $\gamma$  on gel filtration.**

HP1 $\gamma$  whose GST-tag was removed was loaded onto a Superdex 200 column (1 x 30 cm), equilibrated with a buffer containing either 0.2 mM EDTA (solid line) or presence of 3 mM MgCl<sub>2</sub> (dotted line). Absorbance at 280 nm was monitored.

**Supplementary Figure S7.  $\text{MgCl}_2$  dependent interaction between HP1 $\gamma$  and tetra-nucleosomes.**

Unmethylated H3 (lanes 1, 2, 5, and 6) or H3K9me3 (lanes 3, 4, 7, and 8) tetra-nucleosomes were incubated with HP1 $\gamma$ , in the reaction buffer containing 50 mM NaCl, either in the presence of 6 mM (lanes 1-4) or in the absence of  $\text{MgCl}_2$  (lanes 5-8). After incubation, mixtures were centrifuged and then the supernatant (S) and precipitated (P) fractions were separately recovered. Histone H4 and HP1 $\gamma$  in the fractions were detected with Western blotting.

**Supplementary Figure S8. Binding activity of GST-HP1 $\alpha$  towards H3K9me3 tetra-nucleosomes in the presence or absence of  $\text{MgCl}_2$ .**

Unmethylated or H3K9me3 tetra-nucleosomes, were incubated with GST-HP1 $\alpha$  bound to GSH Sepharose, as described in either Figure 1C (in the absence of  $\text{MgCl}_2$ ) or Figure 2A, in the presence of 3 mM  $\text{MgCl}_2$  and 50 mM NaCl. **(A)** Two pmol of reconstituted nucleosomes were incubated with 80 pmol of GST-HP1 $\gamma$ -bound GSH-Sepharose. The data for binding activity of HP1 $\alpha$  in the absence of  $\text{MgCl}_2$  are taken from previous report (2) **(B)** Four pmol of reconstituted nucleosomes were incubated with 40 pmol of GST-HP1 $\gamma$ -bound GSH-Sepharose. The binding activity was quantitated as in Figure 1C. Means  $\pm$  S. E. (n=3) are shown.

**Supplementary Figure S9. Precipitation of tetra-nucleosomes in the presence of H1 isoforms.**

Unmethylated H3 (unme, lanes 1, 2, 5, 6, 9, 10, 13, 14, 17 and 18) or H3K9me3 (K9me3, lanes 3, 4, 7, 8, 11, 12, 15, 16, 19 and 20) tetra-nucleosomes were incubated without (lane 1-4), or with H1.2 (lanes 5-8), H1.3 (lanes 9-12), H1.4 (lanes 13-16), or H1.5 (lanes 17-20). After the incubation, the reaction mixtures were centrifuged, and supernatant (S) and precipitated (P) fractions were separately recovered, and then electrophoresed in an 18% SDS-polyacrylamide gel. Arrow and bracket indicate H1 and core histones, respectively. Molecular size markers are shown at the left of the gel (kDa).

**Supplementary Figure S10. HP1 $\gamma$  or/and H1 does not form aggregation.**

HP1 $\gamma$  (WT) (lanes 1 and 2), HP1 $\gamma$  I155K (I155K) (lanes 3 and 4), HP1 $\gamma$  CD (lanes 5 and 6) (0.5  $\mu\text{M}$ ), or 0.8  $\mu\text{M}$  of H1.2 (lanes 7 and 8), H1.3 (lanes 9 and 10), H1.4 (lanes 11 and 12), or H1.5 (lanes 13 and 14) **(A)**, and a mixture

containing HP1 $\gamma$  (0.5  $\mu$ M) and H1 isoforms (0.8  $\mu$ M), H1.2 (lanes 1 and 2), H1.3 (lanes 3 and 4), H1.4 (lanes 5 and 6), or H1.5 (lanes 7 and 8) **(B)** were centrifuged, supernatant (S) and precipitated (P) fractions were separately recovered, and then analyzed as in **Supplementary Figure S9**. Arrows and arrowheads indicate H1 isoforms and HP1 $\gamma$ , respectively. Molecular size markers (kDa) are shown at the left of images.

**Supplementary Figure S11. Binding of GST-HP1 $\gamma$  to H3K9me3 tetra-nucleosomes condensed by H1 isoforms.**

GST-HP1 $\gamma$  binding to tetra-nucleosomes condensed by H1 isoforms were examined as in **Figure 1C**. GSH-Sepharose, on which GST-HP1 $\gamma$  were anchored, was incubated with unmethylated H3 (unme) or H3K9me3 (K9me3) tetra-nucleosomes. After incubation, input (I), unbound (U), wash (W), and pulled down bound (B) fractions for H1.2, H1.3, H1.4, and H1.5 were separated. Core histones are indicated by brackets **(A)**. The relative amounts of core histones recovered in the bound fraction over the input (%) were calculated and shown as mean  $\pm$  S. E. (n=3) **(B)**.

**Supplementary Figure S12. Binding of GST-HP1 $\gamma$  with tetra-nucleosomes in the presence of truncated H1.3.**

**(A)** Schematic illustration of full-length (FL), the N-terminal deleted H1.3 (37-221) ( $\Delta$ N), and C-terminal deleted H1.3  $\Delta$ C (1-111). Globular domains are indicated by ellipses. **(B)** Binding of truncated H1.3 to tetra-nucleosomes. Unmethylated H3 (unme, upper panel) or H3K9me3 (K9me3, lower panel) tetra-nucleosomes were incubated without H1 (lanes 1 and 10) or with H1.3  $\Delta$ N ( $\Delta$ N) (lanes 2-5 and 11-14), or H1.3  $\Delta$ C ( $\Delta$ C) (lanes 6-9 and 15-18). To 0.2 pmol of histone octamer, a half (lanes 2, 6, 11 and 15), equal (lanes 3, 7, 12 and 16), two-fold (lanes 4, 8, 13 and 17), or four-fold (lanes 5, 9, 14 and 18) molar excess of truncated H1.3 was added and electrophoresed. Tetra-nucleosomes and H1-bound fractions of tetra-nucleosomes are indicated by arrowheads and brackets, respectively. **(C)** Effect of truncated H1.3 on the binding of HP1 $\gamma$  to the tetra-nucleosomes (left panel). Bound over input (%) was determined and means  $\pm$  S. E. (n=3) are shown.

**Supplementary Figure S13. Whole gel images for the main figures.**

The regions excised are shown as red boxes. In panels for Figures 1A, 1C, 1G,

2A, 2C, 2E, 3B, 4A, and 4C, the input (one-fourth of each) (I), unbound (U), wash (W), and bound (B) fractions were electrophoresed. For the binding experiments, unmethylated H3 (unme) or H3K9me3 (K9me3) tetra-nucleosomes were used. The positions of GST, H3, H4, HP1 $\alpha$ , HP1 $\gamma$ , and H1 isoforms are indicated in each corresponding images.

## REFERENCES

- 1, Takeshima, H., Suetake, I., and Tajima, S. (2008). Mouse Dnmt3a preferentially methylates linker DNA and is inhibited by histone H1. *J. Mol. Biol.*, **383**, 810-821.
- 2, Mishima, Y., Watanabe, M., Kawakami, T., Jayasinghe, C. D., Otani, J., Kikugawa, Y., Shirakawa, M., Kimura, H., Nishimura, O., Aimoto, Tajima, S., and Suetake, I. (2013) Hinge and chromoshadow of HP1 $\alpha$  participate in recognition of K9 methylated histone H3 in nucleosomes. *J. Mol. Biol.*, **425**, 54-70.
- 3, Simon, M. D. (2010) Installation of site-specific methylation into histones using methyl lysine analogs. *Curr. Protoc. Mol. Biol. Chapt 21*: unit 21.18, pp. 1-10, John Wiley and Sons, Inc.
- 4, Schwarz, P. M and Hansen, J. C. (1994) Formation and Stability of Higher Order Chromatin Structures. *J. Biol. Chem.*, **269**, 16284-16289.
- 5, Blacketer, M. J., Feely, S. J., and Shogren-Knaak, M. A. (2010) Nucleosome Interactions and Stability in an Ordered Nucleosome Array Model System. *J. Biol. Chem.*, **285**, 34597-34607.
- 6, Lechner, M. S., Schultz, D. C., Negorev, D., Maul, G. G., and Rauscher, F. J. 3rd. (2005) The mammalian heterochromatin protein 1 binds diverse nuclear proteins through a common motif that targets the chromoshadow domain. *Biochem. Biophys. Res. Commun.*, **331**, 929-937.

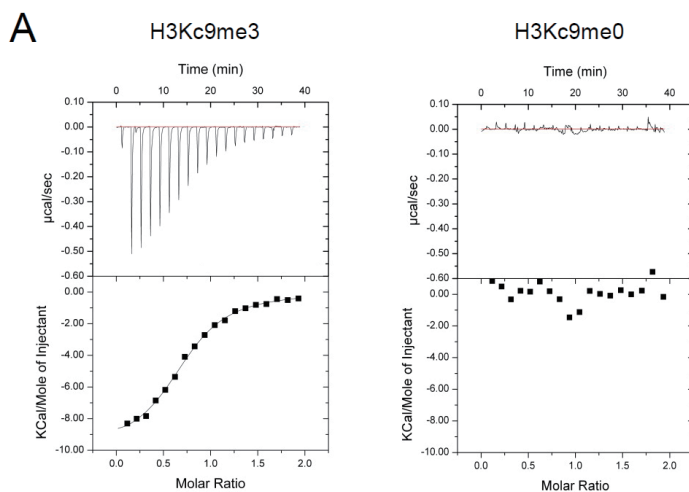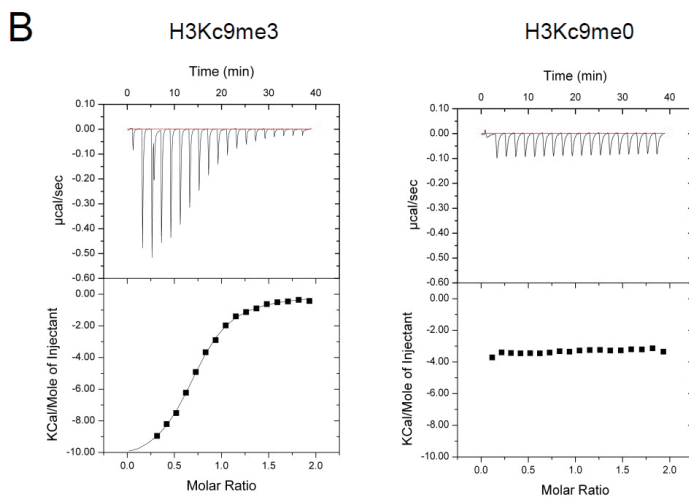

**C**

|              |    | H3Kc9me0 | H3Kc9me3 |
|--------------|----|----------|----------|
| HP1 $\alpha$ | FL | b.d.     | 12*      |
|              | CD | b.d.     | 16*      |
| HP1 $\gamma$ | FL | b.d.     | 2.5      |
|              | CD | b.d.     | 3.9      |

Supplementary Figure S1

**A**

```

HP1α  1 MGKTKRTADSSSSSEDEEEYVVEKVLDRRVVKGQVEYLLKWKGFSEEHTWEPEKNLDCP 60
HP1γ  1 MGKKQNGKSKKVVEEAEPFEEFVVEKVLDRRVVNGKVEYFLKWKGFADANTWEPEENLDCP 60
      *** : . : . . . : ** : ***** : * : * : * : * : * : * : * : *
                                chromo domain (CD)

HP1α  61 ELISEFMKKYKKMKKEGNNKPREKSESNNKRSNFSNSADDIKSKKKREQSNDIARGFERG 120
HP1γ  61 ELIEAFLNSQKAGKE-----KDGTKRKSLSDSESDDSKSKKKRD-AADKPRGFARG 110
      *** . * : . . * ** . : . . . ***** . . . : ** ***** : : * . *** **
                                hinge region (HR)

HP1α  121 LEPEKIIGATDSCGDLFMFLMKWKDTDEADLVLAKEANVKCPQIVIAFYEEERLTWHAYPED 180
HP1γ  111 LDPERIIGAIDSSGELMFLMKWKDSDEADLVLAKEANMKCPQIVIAFYEEERLTWHSCPED 170
      * : * : * : * * * . * : * : * : * : * : * : * : * : * : * : * : * : * : *
                                chromo shadow domain (CSD)

HP1α  181 AENKEKETAKS 193
HP1γ  171 EAQ----- 173
      :

```

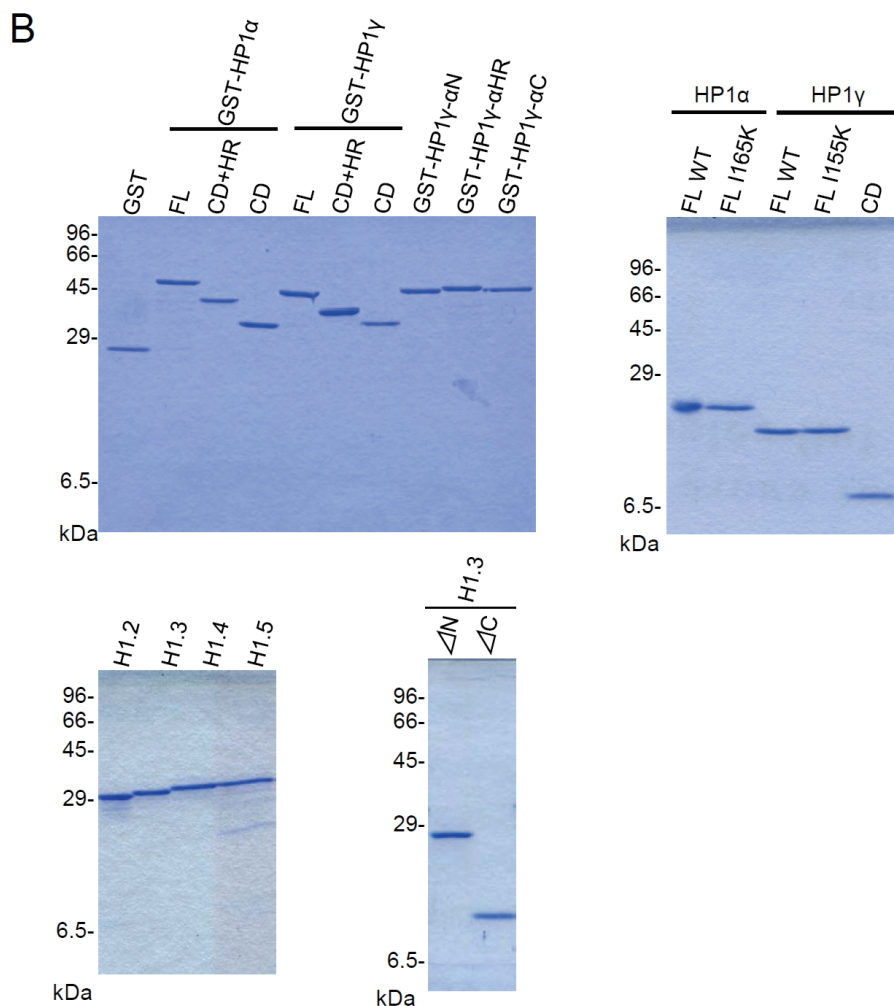

Supplementary Figure S2

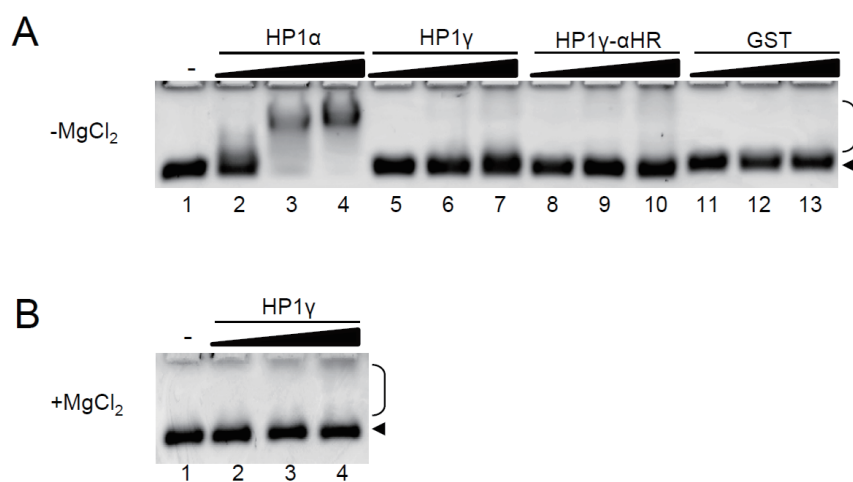

Supplementary Figure S3

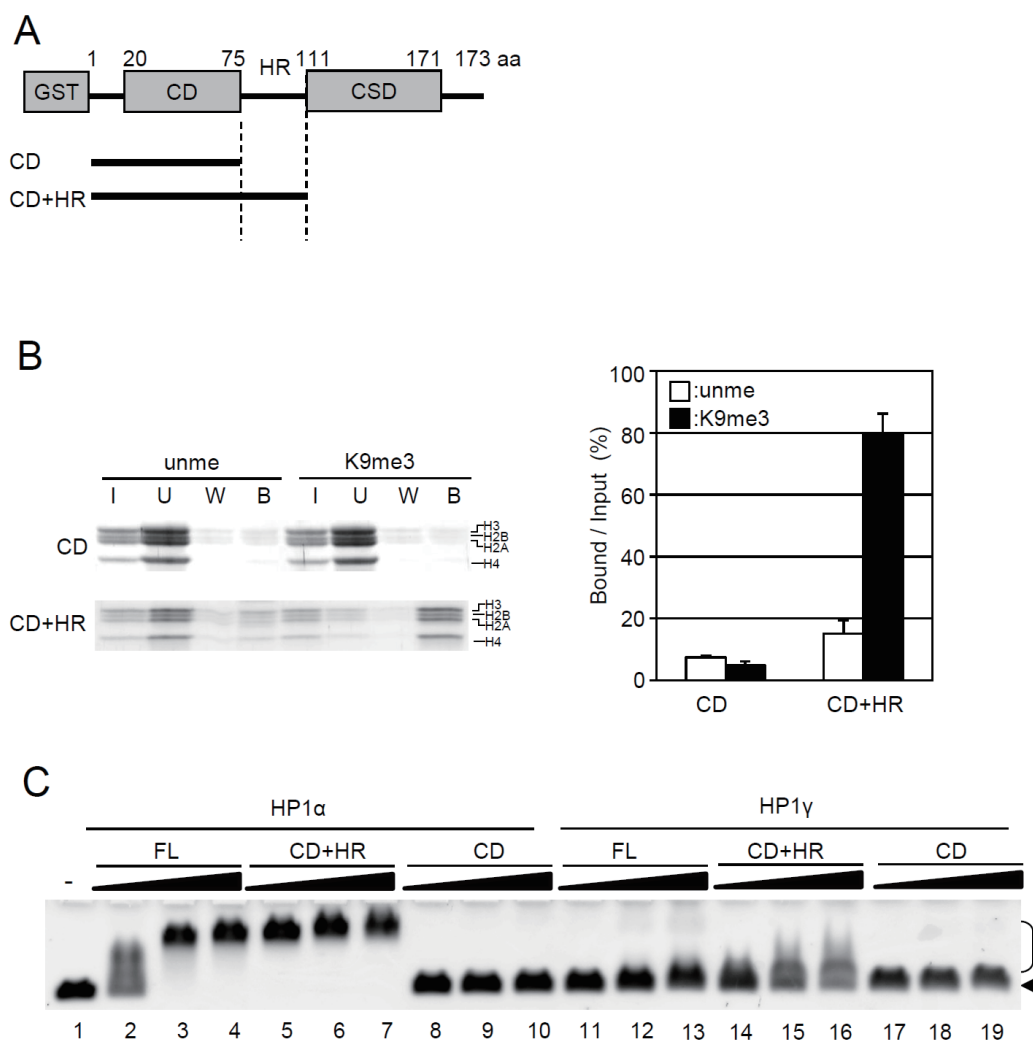

Supplementary Figure S4

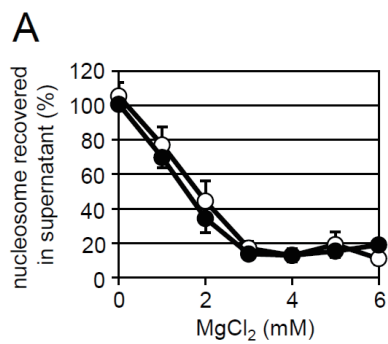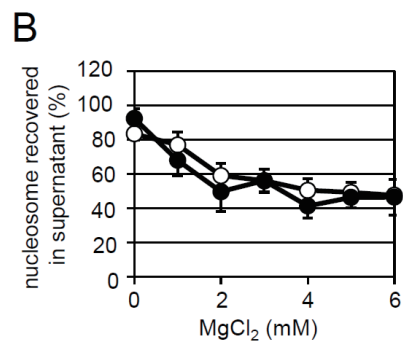

Supplementary Figure S5

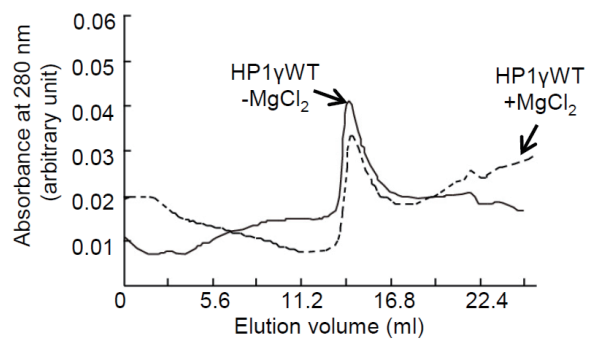

Supplementary Figure S6

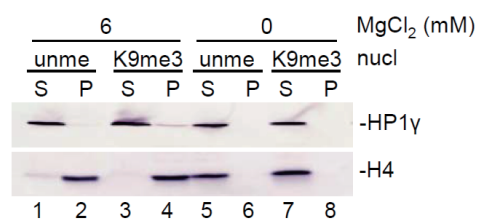

Supplementary Figure S7

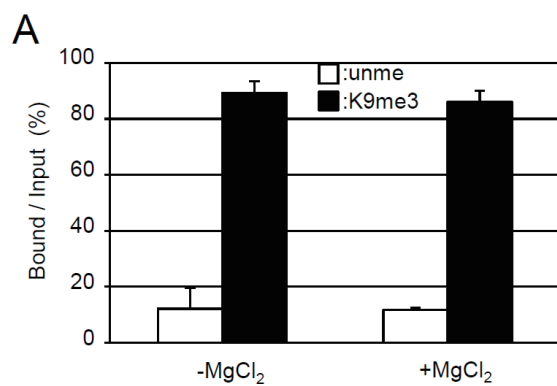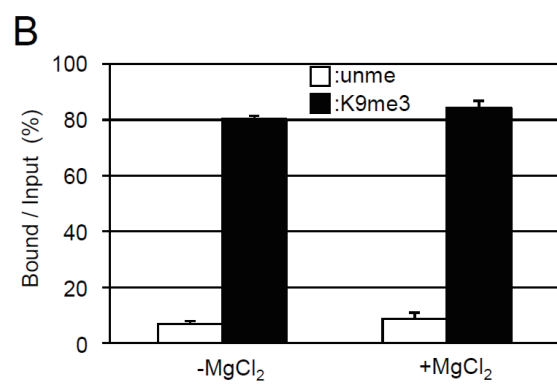

Supplementary Figure S8

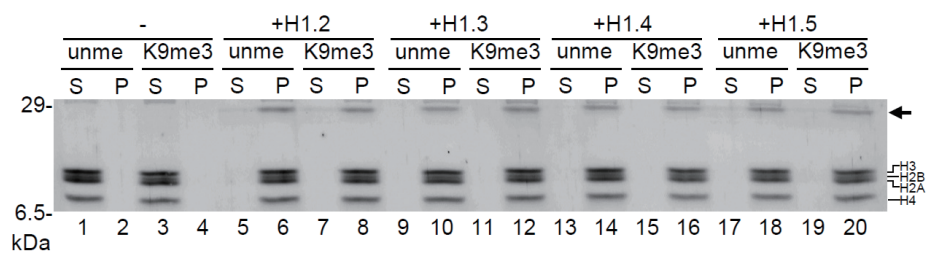

Supplementary Figure S9

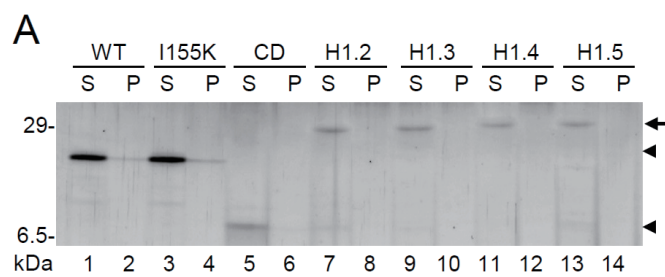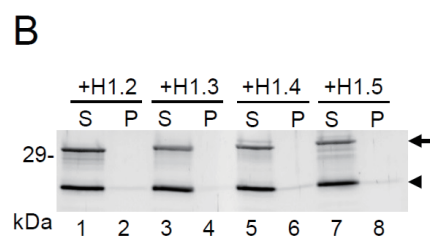

Supplementary Figure S10

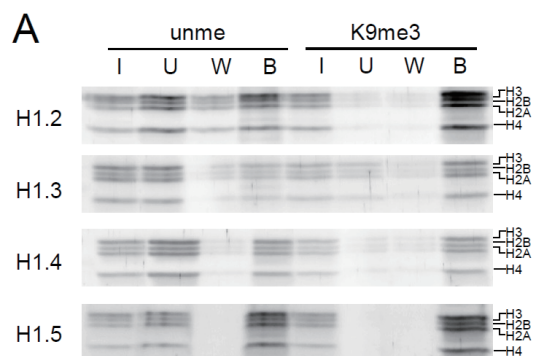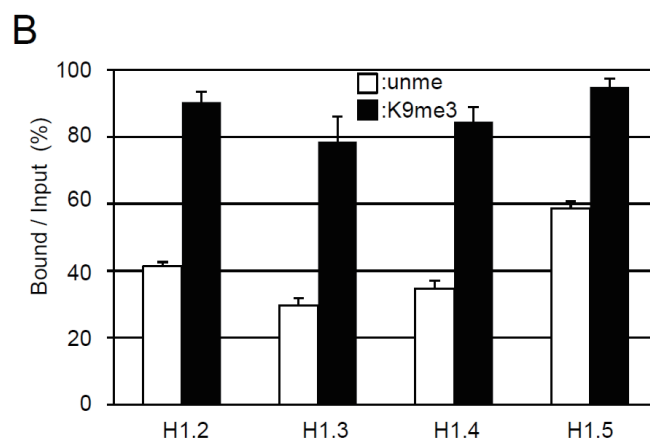

Supplementary Figure S11

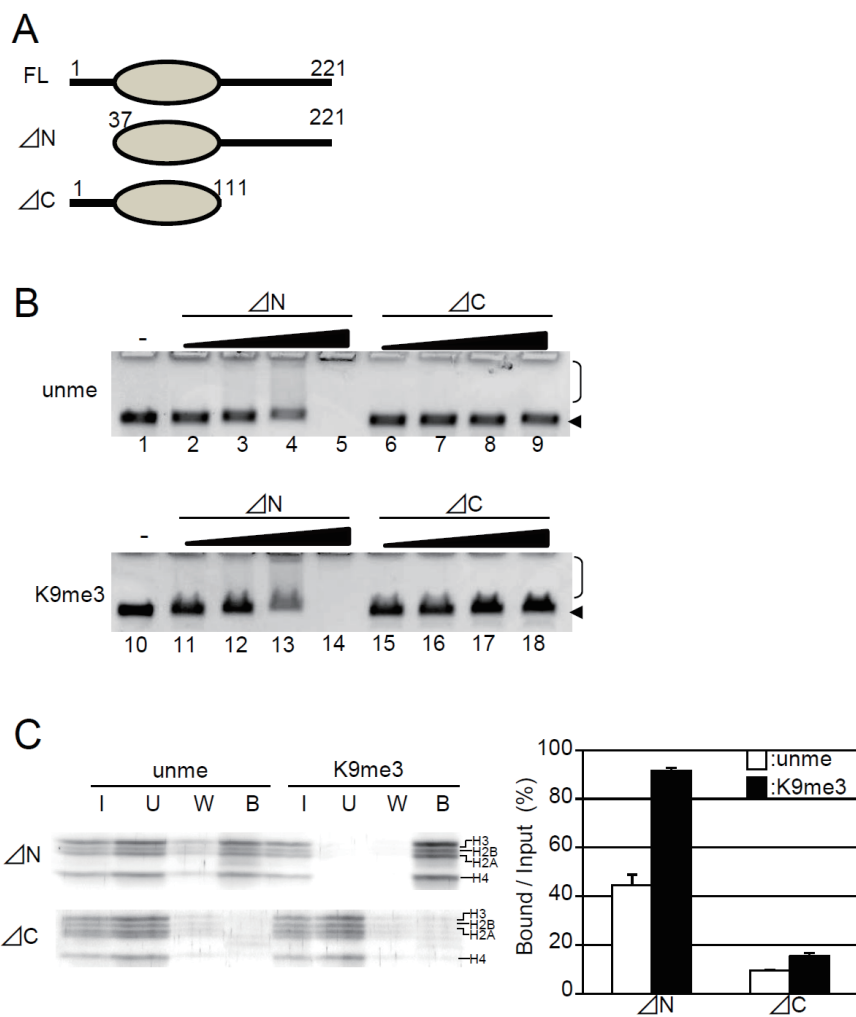

Supplementary Figure S12

Fig. 1A

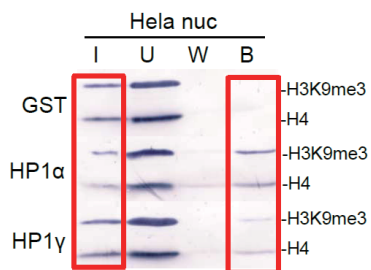

Fig. 1C

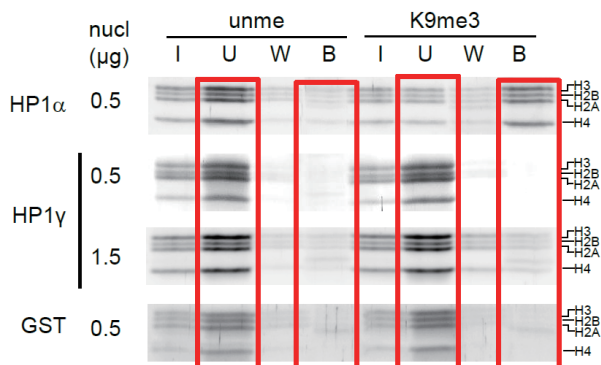

Fig. 1G

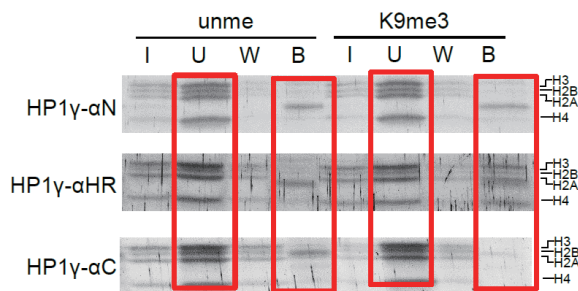

Fig. 2A

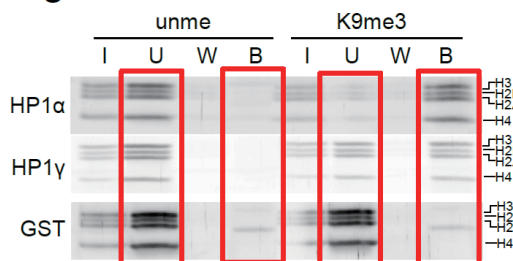

Fig. 2C

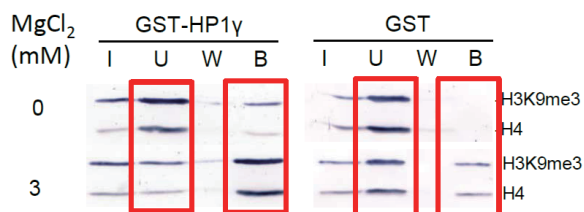

Fig. 2E

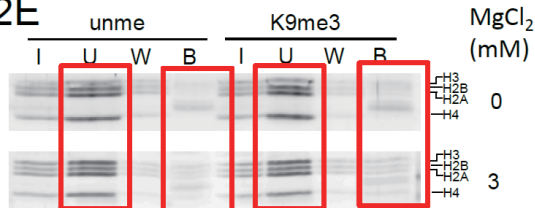

Fig. 3B

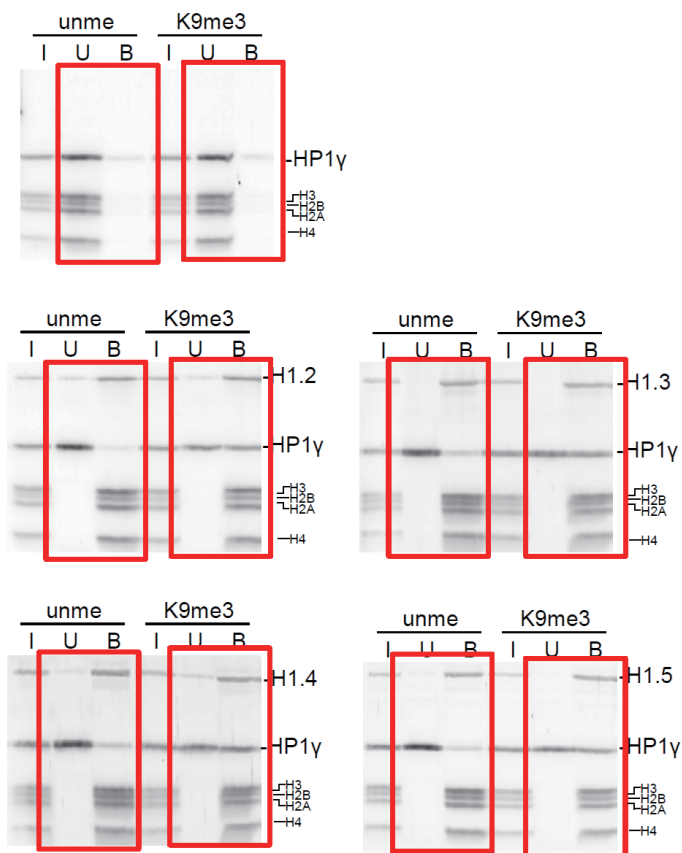

Fig. 4A

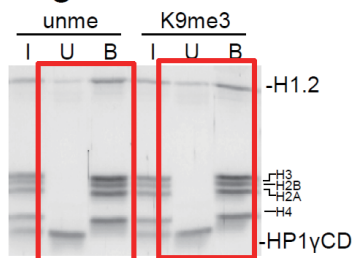

Fig. 4C

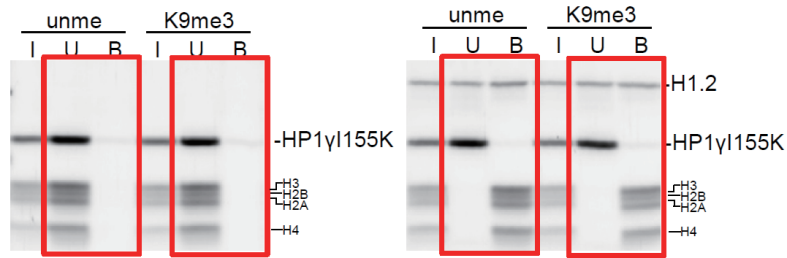

Supplement: SUPPLEMENTARY DATA [file supp_gkv841_nar-01117-m-2015-File007.pdf]
